# Supplementary material
Source: PubMed Central journal article supplement (PMC3129560)
Supplement: mt201120x1.pdf [file mt201120x1.pdf]

Supplementary Table S1.

| For WBC, MCHC and donor chimerism, normality tests failed. ANOVA is on ranks.         |                                      |     |                           |                                    |     |                           |                     |                  |                                    |                                        |        |      |                           |                                    |   |
|---------------------------------------------------------------------------------------|--------------------------------------|-----|---------------------------|------------------------------------|-----|---------------------------|---------------------|------------------|------------------------------------|----------------------------------------|--------|------|---------------------------|------------------------------------|---|
|                                                                                       | WBC ( $\times 10^{-3}/\mu\text{L}$ ) |     |                           | MCHC (g/dL)                        |     |                           | Donor chimerism (%) |                  |                                    | Vector copy number per donor leukocyte |        |      |                           |                                    |   |
|                                                                                       | Mean                                 | SD  | ANOVA on ranks<br>p=0,412 | Mean                               | SD  | ANOVA on ranks<br>p=0,032 | Mean                | SD               | ANOVA on ranks<br>p=0,401          |                                        | Mean   | SD   | ANOVA on ranks<br>p=0,298 |                                    |   |
| C57BL/6                                                                               | 11.3                                 | 7.9 |                           | 35.1                               | 1.7 |                           |                     |                  |                                    |                                        |        |      |                           |                                    |   |
| $\beta$ -thal                                                                         | 9.9                                  | 2.0 |                           | 33.6                               | 0.3 |                           |                     |                  |                                    |                                        |        |      |                           |                                    |   |
| $\beta$ -thal Fresh BM                                                                | 11.2                                 | 0.9 |                           | 33.5                               | 0.4 |                           | 63.8                | 25.2             |                                    | PB                                     | 1.28   | 0.85 |                           |                                    |   |
| $\beta$ -thal Mock Tx BM                                                              | 7.6                                  | 2.5 |                           | 34.6                               | 0.7 |                           | 76.0                | 28.8             |                                    | total BM                               | 0.88   | 0.40 |                           |                                    |   |
| $\beta$ -thal LG Tx BM                                                                | 9.5                                  | 1.1 |                           | 35.1                               | 0.3 |                           | 72.7                | 33.4             |                                    | CFC BM                                 | 0.92   | 0.30 |                           |                                    |   |
| For all the other parameters, the Holm-Sidak method was used for multiple comparisons |                                      |     |                           |                                    |     |                           |                     |                  |                                    |                                        |        |      |                           |                                    |   |
|                                                                                       | Hb (g/dL)                            |     |                           |                                    |     | Retic (%)                 |                     |                  |                                    |                                        | Hc (%) |      |                           |                                    |   |
|                                                                                       | Mean                                 | SD  | ANOVA<br>p<0,001          | Significance Vs.<br>C57 BL/6 Tx BM |     | Mean                      | SD                  | ANOVA<br>p<0,001 | Significance Vs.<br>C57 BL/6 Tx BM |                                        | Mean   | SD   | ANOVA<br>p<0,001          | Significance Vs.<br>C57 BL/6 Tx BM |   |
| C57BL/6                                                                               | 15.4                                 | 1.1 |                           |                                    | N   | 3.0                       | 0.9                 |                  |                                    | N                                      | 43.8   | 2.1  |                           |                                    | N |
| $\beta$ -thal                                                                         | 10.1                                 | 0.2 |                           | Y                                  | Y   | 25.3                      | 2.7                 |                  | Y                                  | Y                                      | 30.1   | 0.8  |                           | Y                                  | Y |
| $\beta$ -thal Fresh BM                                                                | 10.8                                 | 0.5 |                           | Y                                  | Y   | 20.7                      | 5.5                 |                  | Y                                  | Y                                      | 32.2   | 1.9  |                           | Y                                  | Y |
| $\beta$ -thal Mock Tx BM                                                              | 10.9                                 | 0.6 |                           | Y                                  | Y   | 20.0                      | 1.4                 |                  | Y                                  | Y                                      | 31.4   | 1.5  |                           | Y                                  | Y |
| $\beta$ -thal LG Tx BM                                                                | 14.3                                 | 1.1 |                           | N                                  |     | 5.8                       | 1.7                 |                  | N                                  |                                        | 40.9   | 3.4  |                           | N                                  |   |
|                                                                                       | RBC ( $\times 10^6/\mu\text{L}$ )    |     |                           |                                    |     | MCH (pg)                  |                     |                  |                                    |                                        |        |      |                           |                                    |   |
|                                                                                       | Mean                                 | SD  | ANOVA<br>p<0,001          | Significance Vs.<br>C57 BL/6 Tx BM |     | Mean                      | SD                  | ANOVA<br>p<0,001 | Significance Vs.<br>C57 BL/6 Tx BM |                                        |        |      |                           |                                    |   |
| C57BL/6                                                                               | 10.6                                 | 0.7 |                           |                                    | N   | 14.5                      | 0.3                 |                  |                                    | Y                                      |        |      |                           |                                    |   |
| $\beta$ -thal                                                                         | 8.5                                  | 0.2 |                           | Y                                  | Y   | 11.9                      | 0.4                 |                  | Y                                  | Y                                      |        |      |                           |                                    |   |
| $\beta$ -thal Fresh BM                                                                | 9.2                                  | 0.4 |                           | Y                                  | Y   | 11.8                      | 0.5                 |                  | Y                                  | Y                                      |        |      |                           |                                    |   |
| $\beta$ -thal Mock Tx BM                                                              | 8.8                                  | 0.6 |                           | Y                                  | Y   | 12.3                      | 0.5                 |                  | Y                                  | Y                                      |        |      |                           |                                    |   |
| $\beta$ -thal LG Tx BM                                                                | 10.7                                 | 0.7 |                           | N                                  |     | 13.4                      | 0.3                 |                  | Y                                  |                                        |        |      |                           |                                    |   |
