# Supplementary material
Source: PubMed Central journal article supplement (PMC3129560)
Supplement: mt201120x2.pdf [file mt201120x2.pdf]

Supplementary table S2. Integration with respect to transcriptional orientation and exons

| <b>Set</b>                                 | <b>Sites in genes</b> | <b>Sites in exons</b> | <b>Percent in exons</b> | <b>Sites in same orientation as transcription</b> | <b>Percent same orientation as transcription</b> |
|--------------------------------------------|-----------------------|-----------------------|-------------------------|---------------------------------------------------|--------------------------------------------------|
| Pre-transplantation (liquid)               | 427                   | 33                    | 7.73                    | 228                                               | 53.40                                            |
| Pre-transplantation (methylcellulose)      | 219                   | 13                    | 5.94                    | 112                                               | 51.14                                            |
| Pre-transplantation (all)                  | 641                   | 46                    | 7.18                    | 336                                               | 52.42                                            |
| Post-transplantation (uncultured)          | 103                   | 8                     | 7.77                    | 50                                                | 48.54                                            |
| Post-transplantation (methylcellulose)     | 23                    | 0                     | 0.00                    | 13                                                | 56.52                                            |
| Post-transplantation (all)                 | 109                   | 8                     | 7.34                    | 52                                                | 47.71                                            |
| HIV MEFs                                   | 1745                  | 106                   | 6.07                    | 860                                               | 49.28                                            |
| Mouse lenti tumors                         | 138                   | 10                    | 7.25                    | 77                                                | 55.80                                            |
| MRC pre-transplantation (liquid)           | 632                   | 34                    | 5.38                    | 301                                               | 47.63                                            |
| MRC pre-transplantation (methylcellulose)  | 370                   | 23                    | 6.22                    | 193                                               | 52.16                                            |
| MRC pre-transplantation (all)              | 997                   | 56                    | 5.62                    | 490                                               | 49.15                                            |
| MRC post-transplantation (uncultured)      | 239                   | 8                     | 3.35                    | 114                                               | 47.70                                            |
| MRC post-transplantation (methylcellulose) | 75                    | 4                     | 5.33                    | 35                                                | 46.67                                            |
| MRC post-transplantation (all)             | 277                   | 12                    | 4.33                    | 129                                               | 46.57                                            |
| MRC HIV MEF                                | 2492                  | 127                   | 5.10                    | 1273                                              | 51.08                                            |
| MRC mouse lenti tumors                     | 247                   | 13                    | 5.26                    | 133                                               | 53.85                                            |
