# Supplementary material
Source: PubMed Central journal article supplement (PMC3129560)
Supplement: mt201120x3.pdf [file mt201120x3.pdf]

Supplementary Table S3. Frequency of integration in transcription units in published studies

| <b>Study</b>                                                                       | <b>Reference</b> | <b>Vector</b> | <b>Promoter</b> | <b>Time of growth in vivo</b>                      | <b>Percentage in gene pre-transplantation</b> | <b>Percentage in gene post-transplantation</b> | <b>P value</b> |
|------------------------------------------------------------------------------------|------------------|---------------|-----------------|----------------------------------------------------|-----------------------------------------------|------------------------------------------------|----------------|
| This study                                                                         |                  | HIV SIN       | Beta-globin     | 9 months                                           | 67.7                                          | 51.2                                           | 0.014          |
| Lentiviral transduction of Lin- cells to treat a mouse model of WAS                | [42]             | HIV SIN       | WASp            | 5 or 10 weeks                                      | 70.1                                          | 59.2                                           | 0.192          |
| Lentiviral transduction of human CD4+ T cells to deliver an antisense HIV env gene | [20]             | HIV full LTR  | LTR             | 6, 14, 28 or 32 weeks                              | 80.7                                          | 78.2                                           | 0.033          |
| Lentiviral transduction of bone marrow and transplantation into tumor-prone mice   | [9]              | HIV SIN       | PGK             | 6-10 months (mice sacrificed when tumors observed) | 56.0                                          | 58.0                                           | N/A            |
