# Supplementary material
Source: PubMed Central journal article supplement (PMC3129560)
Supplement: mt201120x4.pdf [file mt201120x4.pdf]

Supplementary table S4: Primers and probes used for real-time PCR.

| Assay              | Amplicon Name         | Sequence (5' to 3') or TaqMan expression assay number <sup>a</sup> | gene Modification (5'-3') | Concentration |
|--------------------|-----------------------|--------------------------------------------------------------------|---------------------------|---------------|
| Vector Copy number | GAG F                 | GGAGCTAGAACGATTCGCAGTTA                                            | -                         | 720 nM        |
|                    | LG vector GAG R       | GGTTGTAGCTGTCCCAGTATTTGTC                                          | -                         | 720 nM        |
|                    | GAG P                 | ACAGCCTTCTGATGTCTTAAAAGGCCAGG                                      | FAM-TAMRA                 | 140 nM        |
|                    | Mouse b-actin         | Mm00607939_s1 <sup>a</sup>                                         | FAM-NFQ                   | 1X            |
|                    | Mouse SRY             | MM00441712_s1 <sup>a</sup>                                         | FAM-NFQ                   | 1X            |
| Donor chimerism    | mbActF1               | ACGGCCAGGTCATCACTATTGA                                             |                           | 900 nM        |
|                    | Mouse b-actin mbActR1 | CAAGAAGGAAGGCTGGAAAAGA                                             |                           | 900 nM        |
|                    | mbActP1               | CAACGAGCGGTTCCGATGCCCT                                             | FAM-TAMRA                 | 250 nM        |

FAM: 6-carboxyfluorescein ester, TAMRA: tetramethyl-6-carboxyrhodamine, NFQ: non fluorescent quencher, <sup>a</sup> Applied

Biosystems.
