# Supplementary material
Source: PubMed Central journal article supplement (PMC3129560)
Supplement: mt201120x5.pdf [file mt201120x5.pdf]

Supplementary table S5: Primers used for integration site analysis

| <b>Primer name</b>         | <b>Primer Sequence (5'-3')</b>                                                           |
|----------------------------|------------------------------------------------------------------------------------------|
| Mse linker positive strand | GTAATACGACTCACTATAGGGCTCCGCTTAAGGGAC                                                     |
| Mse linker negative strand | [ Phosp ]-TAGTCCCTTAAGCGGAG-[ AmC7-Q ]                                                   |
| Nla linker positive strand | GTAATACGACTCACTATAGGGCTCCGCTTAAGGGACCATG                                                 |
| Nla linker negative strand | [ Phosp ]-GTCCCTTAAGCGGAG-[ AmC7-Q ]                                                     |
| Linker PCR1                | GTAATACGACTCACTATAGGGC                                                                   |
| Linker PCR2                | AGGGCTCCGCTTAAGGGAC                                                                      |
| Vector PCR1                | CTTAAGCCTCAATAAAGCTTGCCCTTGAG                                                            |
| Vector PCR2                | gccttgccagcccgcagXXXXXXXXXAGACCCTTTTAGTCAGTGTGGAAAATC                                    |
| Mu (-)                     | TCGGATGAAGCGGCGCACGAAAAACGCGAAAGCGTTTCACGATAAATGCGAAAACA-[ AmC7-Q ]                      |
| Mu (+)                     | GTAATACGACTCACTATAGGGCTCCGCTTAAGGGACTGTTTTTCGCATTTATCGTGAAACGCTTTCGCGTTTTTCGTGCGCCGCTTCA |

Modifications – [Phosp]=5' phosphate, [AmC7-Q]=3' amine
