# Supplementary material
Source: PubMed Central journal article supplement (PMC3129560)
Supplement: mt201120x6.pdf [file mt201120x6.pdf]

Supplementary table S6: Primers used for insulator PCR

| <b>Primer name</b> | <b>Primer sequence (5'-3')</b> |
|--------------------|--------------------------------|
| F17                | CCGCGATATCGTCGAGGGTA           |
| F19                | ATTAATTCCTGCAGCCCAG            |
| F20                | TGGAAGGGCTAATTCCTC             |
| R18                | AAAGCAGGGCCGCTCTAGAG           |
| R19                | CGAGTCCTGCGTCGAGAGA            |
